# Supplementary material
Source: HighWire-hosted journal article supplement (https://jech.bmj.com/content/78/2/82)
Supplement: inline-supplementary-material-2 [file inline-supplementary-material-2.pdf]

## Supplementary Materials

### S2: Fixed effects regression results – the effect of cumulative social security cuts on life expectancy at birth (2-year time lag)

| sex    | term                          | ex estimates | 95% CI lower | 95% CI upper | p-value |
|--------|-------------------------------|--------------|--------------|--------------|---------|
| Female | (Intercept)                   | 83.35        | 83.20        | 83.49        | 0.00    |
| Female | Year (mortality)              | 0.09         | 0.04         | 0.14         | 0.00    |
| Female | Social security loss          | -0.08        | -0.13        | -0.03        | 0.00    |
| Female | Scotland                      | -2.36        | -2.49        | -2.23        | 0.00    |
| Female | Wales                         | -1.82        | -2.15        | -1.49        | 0.00    |
| Female | Social security loss*Scotland | -0.06        | -0.09        | -0.02        | 0.00    |
| Female | Social security loss*Wales    | 0.00         | -0.03        | 0.03         | 0.96    |
| Male   | (Intercept)                   | 80.15        | 79.97        | 80.33        | 0.00    |
| Male   | Year (mortality)              | 0.06         | 0.01         | 0.11         | 0.03    |
| Male   | Social security loss          | -0.02        | -0.08        | 0.04         | 0.52    |
| Male   | Scotland                      | -3.22        | -3.43        | -3.02        | 0.00    |
| Male   | Wales                         | -1.50        | -1.74        | -1.25        | 0.00    |
| Male   | Social security loss*Scotland | -0.08        | -0.12        | -0.05        | 0.00    |
| Male   | Social security loss*Wales    | -0.06        | -0.11        | -0.02        | 0.01    |

### S3: Fixed effects regression results - the effect of cumulative social security cuts on remaining life expectancy at age 65 years old.

| sex    | term                          | ex estimates | 95% CI lower | 95% CI upper | p-value |
|--------|-------------------------------|--------------|--------------|--------------|---------|
| Female | (Intercept)                   | 21.53        | 21.46        | 21.60        | 0.00    |
| Female | Year (mortality)              | 0.03         | 0.00         | 0.06         | 0.07    |
| Female | Social security loss          | -0.02        | -0.05        | 0.01         | 0.18    |
| Female | Scotland                      | -1.80        | -1.91        | -1.69        | 0.00    |
| Female | Wales                         | -1.62        | -1.96        | -1.28        | 0.00    |
| Female | Social security loss*Scotland | 0.02         | 0.00         | 0.05         | 0.06    |
| Female | Social security loss*Wales    | -0.02        | -0.05        | 0.00         | 0.05    |
| Male   | (Intercept)                   | 18.77        | 18.51        | 19.03        | 0.00    |
| Male   | Year (mortality)              | 0.07         | 0.03         | 0.11         | 0.00    |
| Male   | Social security loss          | -0.02        | -0.06        | 0.02         | 0.40    |
| Male   | Scotland                      | -1.71        | -2.02        | -1.41        | 0.00    |
| Male   | Wales                         | -0.72        | -1.03        | -0.42        | 0.00    |
| Male   | Social security loss*Scotland | -0.02        | -0.04        | 0.01         | 0.25    |
| Male   | Social security loss*Wales    | -0.01        | -0.04        | 0.02         | 0.66    |

## S4: Lifespan variation at birth

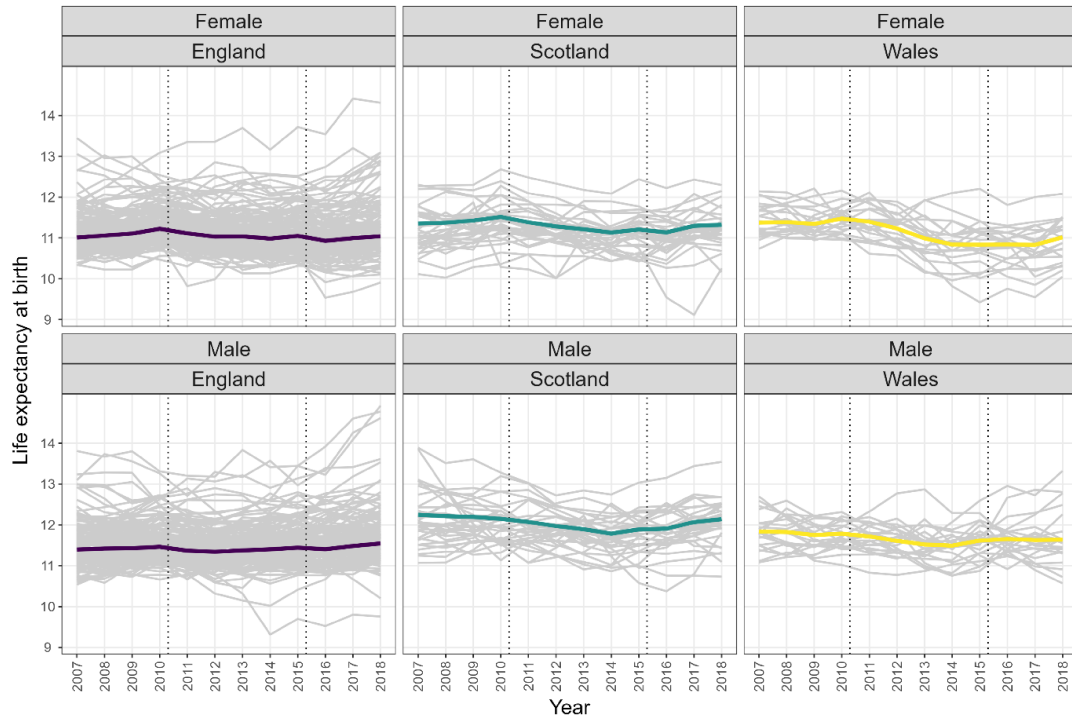

## S5: Fixed effects regression results - the effect of cumulative social security cuts on lifespan variation at age 0.

| sex    | term                          | edagger estimates | 95% CI lower | 95% CI upper | p-value |
|--------|-------------------------------|-------------------|--------------|--------------|---------|
| Female | (Intercept)                   | 11.17             | 11.00        | 11.34        | 0.00    |
| Female | Year (mortality)              | -0.04             | -0.08        | 0.00         | 0.05    |
| Female | Social security loss          | 0.03              | -0.02        | 0.07         | 0.23    |
| Female | Scotland                      | 0.13              | -0.05        | 0.30         | 0.15    |
| Female | Wales                         | -0.24             | -0.71        | 0.23         | 0.31    |
| Female | Social security loss*Scotland | 0.00              | -0.04        | 0.03         | 0.73    |
| Female | Social security loss*Wales    | -0.08             | -0.12        | -0.04        | 0.00    |
| Male   | (Intercept)                   | 11.04             | 10.83        | 11.24        | 0.00    |
| Male   | Year (mortality)              | 0.00              | -0.04        | 0.04         | 0.87    |
| Male   | Social security loss          | 0.03              | -0.01        | 0.06         | 0.19    |
| Male   | Scotland                      | 0.77              | 0.55         | 1.00         | 0.00    |
| Male   | Wales                         | 0.55              | 0.28         | 0.83         | 0.00    |
| Male   | Social security loss*Scotland | -0.05             | -0.08        | -0.02        | 0.00    |
| Male   | Social security loss*Wales    | -0.01             | -0.05        | 0.03         | 0.54    |
